# Supplementary material
Source: publisher figshare collection journal article supplement (https://tandf.figshare.com/ndownloader/files/20771313)
Supplement: Supplementary file 1 [file 20771313]

Table S1: Classification of forage species identified during vegetation sampling.

| Functional group | Family | Species | Life form | References |
| --- | --- | --- | --- | --- |
| Grass | Poaceae | *Poa annua* L. | Annual | GRIN; Sun (1992) |
|  |  | *Elymus dahuricus* Turcz. ex. Griseb. | Perennial | Tilley and St. John (2014) |
|  |  | *Festuca rubra* L. | Perennial | GRIN |
|  |  | *Koeleria cristata* auct. | Perennial | GRIN |
|  |  | *Elymus nutans* Griseb. | Perennial | Dou et al. (2017); Lu (1993) |
|  |  | *Deschampsia cespitosa* (L.) P. Beauv. | Perennial | GRIN |
|  | Cyperaceae (semi-grass) | *Blysmus compressus* L. Panz. Ex Link | Perennial | GRIN; Stroh and Walker (2015) |
| Legume | Fabaceae | *Gueldenstaedtia multiflora* Bunge | Perennial | NCBI Taxonomy; Zhu (2003) |
| Sedge | Cyperaceae | *Carex atrofusca* Schkuhr | Perennial | Bailey (1889); Zheng et al. (2005) |
|  |  | *Carex muliensis* Hand.-Mazz | Perennial | Gao et al. (2014); Zheng et al. (2005) |
|  |  | *Carex meyeriana Kunth* | Perennial | GRIN; Zheng et al. (2005) |
|  |  | *Kobresia Pygmaea* (C. B. Clarke) | Perennial | GRIN, Zhou et al. (2006) |
|  |  | *Kobresia setchwanenesis* Hand-Mazz | Perennial | Sun (1992) |
| Shrub | Asteracea | *Anaphalis lacteal* Maxim | Perennial | Ren et al. (2008) |
| Herb/Forb | Brassicaceae | *Thlaspi arvense* L. | Annual | GRIN |
|  |  | *Capsella bursa-pastoris L.* (Medik) | Annual | GRIN, Grosso et al. (2011) |
| Herb/Forb | Ranunculaceae | *Anemone cathayensis* Kitag ex. Tamura | Perennial | Plants of the world online |
|  |  | *Anemone trullifolia var. linearis* | Perennial | Ziman et al. (2007) |
|  |  | *Anemone rivularis* Buch. –Ham. ex DC. | Perennial | GRIN |
|  |  | *Ranunculus asiaticus* L. | Perennial | GRIN |
|  |  | *Ranunculus brotherusii* (Maxim.) | Perennial | Chen et al. (2015) |
|  |  | *Thalictrum alpinum* L. var. *elatum* | Perennial | GRIN |
|  |  |  |  |  |
| Herb/Forb | Asteraceae | *Aster alpinus* L. | Perennial | GRIN |
|  |  | *Cremanthodium reniforme* (DC.) Benth. | Perennial | GRIN; Plants of the world online |
|  |  | *Saussurea japonica* (Thunb.) DC. | Perennial | GRIN; NCBI taxonomy |
|  |  |  |  |  |
| Herb/Forb | Polygonaceae | *Polygonum aviculare* L. | Annual/  Perennial | GRIN; Tilley and St. John (2014) |
|  |  | *Polygonum macrophyllum* D. Don. | Perennial | Flora of China |
|  |  | *Polygonum viviparum* L. | Perennial | GRIN; Penskar (2008) |
| Herb/Forb | Rosaceae | *Potentilla discolor* Bunge. | Perennial | Flora of China |
|  |  | *Potentilla bifurca* L. | Perennial | Godin (2009); Razanajatovo (2016) |
|  |  | *Sanguisorba tenuifolia var. parviflora* Maximowicz. | Perennial | Flora of China |
|  |  | *Potentilla anserina* L*.* | Perennial | ISTA (2014) |
| Herb/Forb | Apiaceae | *Carum carvi* L*.* | Biennial | ISTA (2014) |
|  | Alpiaceae | *Ligusticum* spp | Perennial | Materia Medica Monthly (n.d) |
| Herb/Forb | Plantaginaceae | *Plantago asiatica* L. | Perennial | GRIN |
| Herb/Forb | Mazaceae | *Lancea tibetica* Hook.f. & Thomson | Annual | Flora of China |
| Herb/Forb | Thymelaeaceae | *Stellerachamae jasme* L. | Perennial | Sun (1992); Xiao et al. (2015) |
| Herb/Forb | Compositae | *Taraxacum lugubre* Dahlst | Perennial | Flora of China |
| Herb/Forb | Geraniaceae | *Geranium pylzowianum* Maximowicz. | Perennial | Flora of China |
| Herb/Forb | Rubiaceae | *Galium verum* L. | Perennial | GRIN; ISTA (2014) |
| Herb/Forb | *Euphorbiaceae* | *Euphorbia esula* L. | Perennial | GRIN; ISTA (2014) |

GRIN: Germplasm Resources Information Network; NCBI: National Center for Biotechnology Information.

**References**

Bailey LH. 1889. Studies of the types various species of the gebus Carex. Notes on Carex - XI. Torrey Bot. Soc. 1: 1–85.

Chen LY, Zhao SY, Wang QF, Moody, ML. 2015. Transcriptome sequencing of three Ranunculus species (Ranunculaceae) reveals candidate genes in adaptation from terrestrial to aquatic habitats. Sci Rep. 5: 1–11. https://doi.org/10.1038/srep10098

Dou Q, Yu F, Li Y, Zhao Y, Liu R. 2017. High molecular karyotype variation revealed in indigenous Elymus nutans in the Qinghai Plateau. Plant Divers. 39: 117–122. https://doi.org/10.1016/j.pld.2017.05.003

Flora of China. [accessed 2019 Oct 17]. <http://www.efloras.org/florataxon.aspx?flora_id=2&taxon_id=242339609>.

Gao JQ, Mo Y, Xu XL, Zhang XW, Yu FH. 2014. Spatiotemporal variations affect uptake of inorganic and organic nitrogen by dominant plant species in an alpine wetland. Plant Soil 381: 271–278. https://doi.org/10.1007/s11104-014-2130-9

Godin VN. 2009. Population structure of Potentilla bifurca L. in the Altai-Sayan Mountain Region. Contemp. Probl Ecol. 2: 456–461. https://doi.org/10.1134/s1995425509050117

GRIN: Germplasm Resources Information Network; NCBI: National Center for Biotechnology Information. [accessed 2019 Oct 17]. <https://npgsweb.ars-grin.gov/gringlobal/search.aspx>.

Grosso C, Vinholes J, Silva LR, de Pinho PG, Gonçalves RF, Valentão P, Jäger AK, Andrade PB. 2011. Chemical composition and biological screening of Capsella bursa-pastoris. Brazilian J Pharmacogn. 21: 635–644. https://doi.org/10.1590/S0102-695X2011005000107

ISTA, 2014. ISTA List of stabilized plant names, 6th ed. Bassersdorf: The International Seed Testing Association (ISTA).

Lu BR. 1993. Meiotic studies of Elymus nutans and E. jacquemontii (Poaceae, Triticeae) and their hybrids with Pseudoroegneria spicata and seventeen Elymus species. Plant Syst Evol 186: 193–212. https://doi.org/10.1007/BF00940798

Materia Medica Monthly (n.d). [accessed 2019 Oct 17]. <http://www.evolutionaryherbalism.com/wp-content/uploads/2017/01/Osha-Ligusticum-spp..pdf>.

NCBI Taxonomy. [accessed 2019 Oct 2017]. <https://www.ncbi.nlm.nih.gov/Taxonomy/Browser/wwwtax.cgi?id=254911>.

Penskar MR. 2008. Special Plant Abstract for Polygonum viviparum (alpine bistort). Michigan Nat Featur Invent Lansing. MI 1–3.

Plants of the world [accessed 2019 Oct 17]. <http://www.plantsoftheworldonline.org/taxon/urn:lsid:ipni.org:names:708293-1>.

Razanajatovo MH. 2016. Reproductive characteristics as drivers of alien plant naturalization and invasion [dissertation]. Baden-Württemberg: Universitat Konstanz.

Ren ZY, Qi HY, Shi YP. 2008. Phytochemical investigation of Anaphalis lactea. Planta Med. 74: 859–863. https://doi.org/10.1055/s-2008-1074547

Stroh PA, Walker KJ. 2015. Blysmus compressus (L.) Panz. Ex Link. Flat-sedge. Species Account. Bot. Soc. Britain Irel.

Sun Q. 1992. Management of pastoral systems in the mountains. Lalitpur: International Cnetre for Integerated Mountain Develoment. "p. 1–29'.

Tilley D, St. John L. 2014. Plant Guide for Dahurian wildrye (Elymus dahuricus). USDA-Natural Resour. 1–3. <https://plants.usda.gov/core/profile?symbol=POAV>

Xiao H, Wang Z, Hong Z. 2015. Preparation method of total sturgeon of Stellerachamae jasme. Patent issued by Shenyang Keyuan Patent & Trademark Agency Co., Ltd., China. Patent number: 201510731106.3.

Zheng H, Wu Y, Ding J, Binion D, Fu W, Reardon R. 2005. Invasive Plants Established in the United States that are Found in Asia and Their Associated Natural Enemies. For Heal. Technol Enterp Team. 2: 1–175.

Zhou H, Tang Y, Zhao X, Zhou L. 2006. Long-term grazing alters species composition and biomass of a shrub meadow on the Qinghai - Tibet plateau. Pak J Bot. 38: 1055–1069.

Zhu XY. 2003. Pollen and seed morphology of Gueldenstaedtia and Tibetia (Leguminosae) - with a special reference to the taxonomic significance. Nord J Bot 23: 373–384. https://doi.org/10.1111/j.1756-1051.2003.tb00408.x

Ziman SN, Ehrendorfer F, Keener CS, Wang WT, Mosyakin SL, Bulakh EV, Tsarenko ON, Dutton BE, Chaudhary RP, Kadota Y. 2007. Revision of Anemone sect. Himalayicae (Ranunculaceae) with three new series, Edinburgh J Bot. https://doi.org/10.1017/S0960428607000765
